## Further development and feasibility randomised controlled trial of a digital programme for adolescent depression, MoodHwb: study protocol

Rhys Bevan Jones<sup>1-3</sup>, Sally Merry<sup>4</sup>, Paul Stallard<sup>5</sup>, Elizabeth Randell<sup>6</sup>, Bryony Weavers<sup>1,2</sup>, Anna Gray<sup>1,2</sup>, Elaine Hindle<sup>7</sup>, Marcela Gavigan<sup>7</sup>, Samantha Clarkstone<sup>6</sup>, Rhys Williams-Thomas<sup>6</sup>, Vincent Poile<sup>6</sup>, Rebecca Playle<sup>6</sup>, Jonathan Bisson<sup>1,2</sup>, Rachel McNamara<sup>6</sup>, \*Frances Rice<sup>1,2</sup>, \*Sharon Anne Simpson<sup>7</sup>

\*Joint senior authors

1. Division of Psychological Medicine and Clinical Neurosciences, Cardiff University, Wales.
2. Wolfson Centre for Young People's Mental Health, Cardiff University, Wales.
3. Cwm Taf Morgannwg University Health Board, Wales.
4. Faculty of Medical and Health Sciences, University of Auckland, New Zealand.
5. Department for Health at the University of Bath, England.
6. Centre for Trials Research, Cardiff University, Wales.
7. Medical Research Council/Chief Scientist Office (MRC/CSO) Social and Public Health Sciences Unit, University of Glasgow, Scotland.

Corresponding author:

Dr Rhys Bevan Jones, Division of Psychological Medicine & Clinical Neurosciences, Cardiff University, Hadyn Ellis Building, Maindy Rd, Cardiff, Wales CF24 4HQ. Email: [bevanjonesr1@cf.ac.uk](mailto:bevanjonesr1@cf.ac.uk)

Word count 4000

## Abstract

**Introduction:** A digital programme, MoodHwb, was co-designed with young people experiencing or at high risk of depression, parents/carers, and professionals, to provide support for young people with their mood and wellbeing. A preliminary evaluation study provided support for the programme theory and found that MoodHwb was acceptable to use. The present study aims to refine the programme based on user feedback, and to assess the acceptability and feasibility of the updated version and study methods.

**Methods and analysis:** Initially, this study will refine MoodHwb with the involvement of young people, including in a pre-trial acceptability phase. This will be followed by a multi-centre feasibility randomised controlled trial comparing MoodHwb plus usual care with a digital information pack plus usual care. Up to 120 young people aged 13-19 years with symptoms of depression and their parents/carers will be recruited through schools, primary mental health services, youth services, charities, and voluntary self-referral in Wales and Scotland. The primary outcomes are the feasibility and acceptability of the MoodHwb programme (including usage, design, and content) and of trial methods (including recruitment and retention rates), assessed two months post-randomisation. Secondary outcomes include potential impact on domains including depression knowledge and stigma, help-seeking, wellbeing and depression and anxiety symptoms measured at two months post-randomisation.

**Ethics and dissemination:** The pre-trial acceptability phase was approved by the Cardiff University School of Medicine Research Ethics Committee (REC) and the University of Glasgow College of Medicine, Veterinary and Life Sciences REC. The trial was approved by Wales NHS REC 3 (21/WA/0205), the Health Research Authority (HRA), Health and Care Research Wales (HCRW), university health board R&D departments in Wales, and schools in Wales and Scotland. Findings will be disseminated in peer-reviewed open-access journals, at conferences and meetings, and online to academic, clinical, and educational audiences and the wider public.

**Trial registration number:** ISRCTN12437531.

### Strengths and limitations of this study

- MoodHwb was co-designed with young people with lived experience or at high risk of depression, parents/carers, and practitioners.

- MoodHwb is bilingual, personalised according to user needs and preferences, and has been developed in line with evidence-based approaches to support young people with depressive symptoms and their parents/carers, friends, and practitioners.
- Multiple methods will be used to collect data in a range of settings for the trial, including validated questionnaires, semi-structured interviews, a focus group, and Web/app usage monitoring.
- As this is a feasibility study, we will not be able to determine the effectiveness of MoodHwb; however, the findings will inform the design of a definitive effectiveness trial.
- Participants will not be blind to treatment allocation as this is not possible with an intervention of this kind.

## BACKGROUND

Depression is common in adolescence, and is associated with social and educational impairments, deliberate self-harm, and suicide. It can also mark the beginning of long-term mental health difficulties. Subthreshold depressive symptoms can also affect quality of life and are a risk indicator for depressive disorder. Early treatment and prevention of adolescent depression is therefore a major public health concern[1]. There are also concerns about the economic burden of mental disorders[2,3]. However, most adolescents with depression do not access or receive formal help and engaging young people (YP) in prevention and early intervention programmes is challenging[4-6].

Guidelines for the prevention and management of depression in YP (e.g., NICE[7]; AACAP[8]) stress the need for good information and evidence-based psychosocial interventions for YP and families/carers, and digital interventions are recommended for mild depression in UK NICE guidelines[7]. Digital mental health technologies (i.e., resources and interventions) are a potential way of increasing access to support, at relatively low cost. Most YP in high-income countries have access to the internet and mobile devices, including in the UK[9,10]. Many in low and middle-income countries (LMICs) can also access the internet, where there are few alternative sources of support[11]. Whilst there is increasing evidence for the effectiveness of technologies for adolescent depression[12,13], more programmes are needed to support adolescents that are accessible, evidence-based, developed with user input and evaluated in line with research frameworks – and to provide greater options for YP in accessing help[14].

MoodHwb is a bilingual (English and Welsh), interactive, and multi-platform digital programme designed to support YP with their mood and wellbeing - and their families/carers, friends, and

practitioners (**figure 1**).

FIGURE 1 HERE

It was co-designed using a series of interviews and focus groups with YP experiencing or at high risk of depressive symptoms (due to family history), parents/carers, and professionals, alongside workshops with a digital media company and an animator[15-17]. The development was also informed by a systematic review[18], design, educational and psychological theories, and a preliminary 'logic model' (programme theory)(**figure 2**).

FIGURE 2 HERE

As part of the developmental work, there was an early evaluation of MoodHwb with a small number of YP and their parents/carers and practitioners, recruited via primary and secondary Child and Adolescent Mental Health Services (CAMHS), school counsellors and nurses, and a previous study sample (Early Prediction of Adolescent Depression (EPAD) study)[19]. Preliminary results were encouraging, and participants found the programme acceptable to use and gave feedback on how it could be improved. Findings also provided initial support for the programme theory, particularly regarding depression literacy, self-efficacy, and depressive symptoms. In line with guidance for complex interventions, a larger feasibility trial is now required[20,21].

The primary aims of the current study are to further refine and evaluate the feasibility, acceptability, and potential impact of the digital programme MoodHwb and the feasibility and acceptability of the trial methods.

## **METHODS AND ANALYSIS**

### **Initial development phase**

The first phase involves the further refinement of the digital programme, based on the feedback provided by participants during the earlier evaluation. The key revisions recommended included improving the navigation, audiovisual and interactive elements, making it more personalised based on user preferences, developing the app version, and expanding the self-help and anxiety

content[19]. There were subsequent consultations with practitioners at the proposed trial recruitment centres across Wales and Scotland, and researchers in the field.

Regular updates are required to the design and content of digital programmes because of the fast-moving pace of the field and the emerging evidence and guidelines. We have completed reviews of the co-design of digital technologies with children and YP[17] and technologies to support YP with depression and anxiety[14]. The principal investigator (PI) has visited research centres in youth and digital mental health in New Zealand, Australia, and the Republic of Georgia. Workshops and meetings will be held with the digital media company and animator that helped to develop the original prototype.

As part of a pre-trial acceptability phase, YP in Wales and Scotland (n=10-15) will be given access to the new prototype. They will be recruited through school counsellors, charities, youth advisory groups (YAGs) and self-referrals. Adolescents will be eligible to take part if they are aged 13-19 years and have sufficient understanding of the English language, access to the internet and a valid email address. They will be interviewed to ensure that the changes made are acceptable ahead of the trial, and to explore issues of transferability in Scotland, given that the programme was developed in Wales. We will aim to recruit some YP who have experienced depressive symptoms. However, others with no experience of mental health difficulties will also give feedback e.g., on whether the programme is user-friendly and age-appropriate. Practitioners from health, education and youth services will be consulted further regarding the new prototype through meetings and online communication.

## **Trial design**

The feasibility study is a multi-centre feasibility randomised controlled trial (RCT) comparing the MoodHwb programme plus usual care (if the young person is receiving support) to digital information sheets on mood and wellbeing plus usual care (if receiving support)(**figure 3**). The research plan follows guidance for complex interventions[20,21], and digital person-centred interventions[22].

FIGURE 3 HERE

## Setting and participants

Trial participants will be identified by practitioners in schools (by e.g., counsellors, nurses, teachers), primary mental health centres, charities, youth services and sports academies in Wales, and in schools and charities via the second site at the University of Glasgow, Scotland. The School Health Research Network (SHRN, Wales) and Schools Health and Wellbeing Improvement Research Network (SHINE, Scotland) will be involved. These sources were chosen as the developmental work suggested that the most appropriate setting for the programme would be the time when depressive difficulties start and YP first present - and is therefore a form of early intervention[16,19]. We will also recruit self-referrals, for example through social media and online advertising, including through the National Centre for Mental Health (NCMH), Wolfson Centre for YP's Mental Health (WCYPMH) and TRIUMPH youth mental health network.

Young people will be eligible if they: (1) are aged 13-19 years, (2) are experiencing depressive symptoms, (3) have a sufficient understanding of English to complete outcomes measures, (4) have access to the internet and a valid email address, and (5) live in Wales or Scotland. Exclusion criteria are: (1) already receiving specialist treatment for depression (e.g., cognitive behavioural therapy (CBT) in secondary CAMHS), and (2) the presence of other mental health difficulties where alternative support might be appropriate. Parents and carers will be targeted for the trial if they have an adolescent with depressive symptoms. Professionals will be approached if they work with YP who present with mental health difficulties.

## Sample size

We aim to recruit up to 120 adolescent participants, and their parents/carers. Approximately two-thirds of the participants will be from Wales and one-third from Scotland. We expect a dropout of around 30%, based on previous digital health studies and the development and early evaluation work. With a sample size of 120 we can estimate the overall expected retention rate of 0.7 to within +/-0.082 (70% +/-8.2%) and within group retention as 0.7+/-0.116 based on the width of a two-sided 95% confidence interval (CI).

## Recruitment

School, mental health, youth, or charity practitioners will identify potentially eligible YP and ask them whether they are interested in participating. The practitioners will provide a study postcard which directs the YP to the bilingual study website ([www.ncmh.info/digital-support-study/](http://www.ncmh.info/digital-support-study/)), where there will be details of the study and information sheets. We will ask practitioners to keep a screening log of all YP approached. There will be a link to the website via social media and online advertisements for self-referrals.

If they are interested in taking part, YP will be asked to complete an online eligibility form on the website. This will include questions on their contact details and to assess whether they meet the eligibility criteria, including items from the Mood and Feelings Questionnaire (MFQ)[23]. They would be eligible if they score 20 or over on the MFQ. If they score 29 or over, they would also be advised to seek help and we will contact their general practitioner (GP), as this indicates a ‘major depressive disorder’[24]. They will not be eligible if they access specialist treatment (e.g. CBT; see exclusion criteria). These cut-offs have been used in previous trials of digital interventions for depression in YP[25,26]. The research team will then contact those who are interested to discuss the project (including consent forms and questionnaires), confirm their eligibility, respond to their questions, and ask whether their parents/carers are interested in participating.

## Consent

Online consent forms are provided for the participants to complete, before completion of baseline questionnaires. If under 16 years old, YP will be asked to provide assent while their parent or legal guardian will be asked for consent. Dual consent and assent will be required for participation. Those aged 16 years or older will be able to provide their own consent. Parents/guardians and professionals who participate will also be asked to complete consent forms.

## Randomisation

Participants will be randomised at a 2:1 ratio to either the digital programme, MoodHwb plus usual care, or digital information sheets on mood and wellbeing in YP plus usual care (**figure 3**). We decided to randomise at a 2:1 ratio to allow for more information to be gained about those receiving

the intervention. The permuted block randomisation will be computerised and stratified according to site (Wales and Scotland). This will be built into the study database overseen by the Centre for Trials Research (CTR, Cardiff University), providing remote access and preserving allocation concealment. Because of the nature of the intervention, participants will not be blind to their allocation, however data analysis will be carried out blind to allocation.

## Intervention

MoodHwb is a digital programme to support YP with their mood and wellbeing, particularly those with elevated depressive symptoms. It can also be used by their families/carers, friends, and practitioners. The programme and development process are described in detail in previous publications[15-17].

It is designed to engage YP by using developmentally appropriate language, illustrations, animations, and interactive components. It aims to promote self-help, help-seeking where appropriate and social support. Whilst it was founded primarily on psychoeducation, it also includes elements of CBT, behavioural activation, positive psychology, and interpersonal, family systems and behaviour change theories. The first version was developed primarily as a website, although the interactive sections (e.g., mood diary) are also available in an 'app'. It could be used independently as a 'standalone' programme by YP (or parents/carers, friends, or professionals) or supported by another person.

From the welcome screen, the user is asked questions (e.g., regarding their mood and anxiety levels), and the answers (i) are stored in their 'profile' section, and (ii) help to signpost to the relevant subsections on the subsequent 'dashboard' screen, therefore personalising the content. Along with this 'mood diary', there are other interactive elements: a goal-setting element and a section to save links to helpful resources. Five sections were developed for YP (**figure 1**), and these cover: (i) low mood and depression, (ii) possible reasons, (iii) self-help approaches, (iv) sources of help and (v) associated health difficulties. There is a sixth section to support those who might be concerned about YP, such as parents/carers, friends, and practitioners. It is recommended that users navigate sections in this order, but they can use it in any way that is helpful for them. Each of these sections includes information, animations, personal stories, exercises, and links to relevant resources. MoodHwb is bilingual - 'hwb' is the Welsh translation for 'hub', and can mean a 'lift' or 'boost'. HwbHwyliau is the Welsh name for the programme.

Participants in the control arm will be emailed a digital information pack, which will consist of digital information sheets on mood and wellbeing (including depression) from the NCMH, Royal College of



Psychiatrists and YoungMinds websites.

## Patient and public involvement

The programme was co-designed using a series of interviews (n=12) and focus groups (n=6) with (i) YP who either had a history of depression or were at elevated risk, (ii) parents/carers, and (iii) professionals. Participants were recruited from CAMHS in Wales, and families from the EPAD study. As noted, further feedback on the programme was provided during the early evaluation[19].

The project has been adopted by the Centre for Development, Evaluation, Complexity and Implementation in Public Health Improvement (DECIPHer, Cardiff University), and the study plans were developed in collaboration with their YAG, ALPHA (Advice Leading to Public Health Advancement). We will collaborate further with them as well as the YAGs of the WCYPMH, NCMH and TRIUMPH network. A young person has been invited to join the Trial Steering Committee (TSC), and other YP (aged 13 to 16 years) have reviewed study documents e.g., information sheets and consent forms. Practitioners and researchers have been consulted regarding the plans.

## Assessment schedule

Data will be collected at (i) baseline and (ii) follow-up, two months after randomisation. Data will be collected from (i) baseline and follow-up online questionnaires; (ii) semi-structured interviews with YP and parents/carers who used the programme; (iii) a focus group with professionals and (iv) Web/app usage data (**table 1**).

**Table 1:** Schedule of enrolment, interventions and assessments for the trial<sup>1</sup>

| Time point                                                                   | Screening<br>(contact 1) | Baseline<br>(contact 1) |         | Month 2<br>(contact 2) |         |
|------------------------------------------------------------------------------|--------------------------|-------------------------|---------|------------------------|---------|
|                                                                              |                          | Inter-<br>vention       | Control | Inter-<br>vention      | Control |
| Referral to the trial/Register of interest                                   | X                        |                         |         |                        |         |
| Eligibility assessment                                                       | X                        |                         |         |                        |         |
| Consent process                                                              | X                        |                         |         |                        |         |
| Randomisation                                                                | X                        |                         |         |                        |         |
| Access to MoodHwb                                                            |                          | X                       |         |                        |         |
| <b>Questionnaires</b>                                                        |                          |                         |         |                        |         |
| Adolescent Depression Knowledge Questionnaire (ADKQ)[27]                     |                          | •/○                     | •/○     | •/○                    | •/○     |
| Depression Stigma Scale (DSS)[28]                                            |                          | •/○                     | •/○     | •/○                    | •/○     |
| General Self-Efficacy Scale (GSE)[29]                                        |                          | •                       | •       | •                      | •       |
| General Health-Seeking Questionnaire (GHSQ)[30]                              |                          | •                       | •       | •                      | •       |
| Warwick-Edinburgh Mental Wellbeing Scales (WEMWBS)[31]                       |                          | •/○                     | •/○     | •/○                    | •/○     |
| Mood and Feelings Questionnaire (MFQ)[23]                                    |                          | •/○                     | •/○     | •/○                    | •/○     |
| Revised Children's Anxiety and Depression Scale-Short Version (RCADS-25)[32] |                          | •/○                     | •/○     | •/○                    | •/○     |
| Hospital Anxiety and Depression Scale (HADS)[33]                             |                          | ○                       | ○       | ○                      | ○       |
| Items on Health economics & Life Events[34]                                  |                          | •/○                     | •/○     | •/○                    | •/○     |
| Items on use and acceptability of MoodHwb                                    |                          |                         |         | •/○                    |         |
| <b>Process evaluation</b>                                                    |                          |                         |         |                        |         |
| Young person interview (n=20-25)                                             |                          |                         |         | •                      |         |
| Parent/carer Interview (n=10-15)                                             |                          |                         |         | ○                      |         |
| Professionals focus group                                                    |                          |                         |         | *                      |         |

(• participant/○ parent/\*professionals) 'Contact' will comprise phone/videoconferencing discussion and completion of online forms/questionnaires. <sup>1</sup> Taken from the HRA CTIMP protocol template (2016).

We will use remote methods for recruitment, consent, and data collection (e.g., phone, email, videoconferencing, online forms and questionnaires) because these have been shown to be efficient and effective ways of conducting research during the Covid-19 pandemic. This approach is consistent with the digital nature of the programme and would enable us to reach more YP. All participants will be offered £10 gift vouchers after (i) completing baseline questionnaires, (ii) completing follow-up questionnaires, and (iii) participating in interviews.

## Baseline

At baseline, YP in both arms will complete questionnaires which will include items on their demographic and contact information, health and use of services, and standardised questionnaires on knowledge, stigma, self-efficacy, help-seeking, wellbeing, symptoms, and life stresses (**table 1**). The parent/carer questionnaires will include items on the young person's details, use of services and symptoms, and their knowledge, beliefs, wellbeing, and symptoms. All participants will also complete items on the acceptability of the questionnaires.

## Follow-up

All baseline measures will be repeated at the follow-up timepoint, two months post-randomisation. In addition, those in the intervention arm will be asked about their use of the programme, and their views on the content and design. Those in the control arm will be asked whether they had access to MoodHwb, to explore contamination. A subgroup of YP (n=up to 20-25) and parents/carers (n=up to 10-15) who used the programme will be interviewed at follow-up on their use of and views of MoodHwb and the evaluation process. The Web/app usage of those using the programme will be monitored using Google Analytics up to 6 months post-randomisation, to provide information on longer-term use. There will be a focus group for professionals who work with YP from a range of settings, to ascertain their views.

## Process evaluation

The interviews with YP and parents/carers at follow-up and practitioner focus group noted earlier will provide more in-depth information on the acceptability and feasibility of the programme and evaluation process – in addition to the questionnaire and Web/app usage data. Participants will be purposively selected for interview based on their usage of MoodHwb (i.e., frequent or occasional), age, gender, support received (e.g. school, health service), and primary language (English, Welsh) – so that there is a broad range of viewpoints. A process evaluation framework has been developed, following MRC guidance[35], and focuses primarily on the intervention but also examines certain trial processes. It addresses issues regarding reach, contamination, retention, recruitment, context, exposure, and fidelity.

## Outcome measures

### Primary outcome

The feasibility and acceptability of MoodHwb outcomes will include the level of usage and adherence (including number of times accessed and duration of use), views and acceptability of the design and content (including strengths, areas to develop further and approaches to integrate into services and charities), and technical and accessibility aspects. The feasibility and acceptability outcomes of the trial methods will include recruitment and retention rates, completeness of measures, representativeness, randomisation, contamination, and acceptability (particularly of the remote methods). Progression criteria for a full trial have been developed with the TSC, based on these outcomes (**appendix 1**).

### Secondary outcomes

Secondary outcomes assess the potential impact of the programme on a core set of domains, including depression literacy or knowledge, depression stigma, help-seeking behaviour, self-efficacy, wellbeing, and depression and anxiety symptoms. These will be measured via standardised validated questionnaires (**table 1**), and participant feedback (via questionnaires and interviews).

## Exploratory economic evaluation

We will investigate the feasibility and acceptability of collecting health economic data. We will identify and measure the resources involved in intervention delivery as well as resource use by participants, with reference to methodology from health economics guidance[36,37]. An estimation of the following will be collected: i) intervention costs (development, hosting, and maintenance costs), ii) health (e.g., contact with GPs, hospitals and other health settings, medication), social, educational, and personal resource costs, using questionnaire items adapted from the Client Service Receipt Inventory, iii) wellbeing, using WEMWBS[31].

## Planned analysis

Primary outcome findings will be derived primarily from analysis of the questionnaires, interviews, and focus group, with additional analysis of Web/app usage data regarding usage, adherence and technical aspects, and screening logs and participant database regarding recruitment and retention. Secondary outcome findings will be derived primarily from analysis of validated questionnaires.

## Participant and Web usage data

The flow of participants through the trial will be presented as a CONSORT flowchart[38]. Baseline demographic data will be presented for all consented and randomised participants. This will be summarised and tabulated for the whole group and by arm, using mean (SD) or median (IQR) where appropriate. All subsequent summaries will use complete cases and will employ the intention to treat principle (participants will remain in groups to which they were randomised irrespective of intervention received). Web usage data from Google Analytics will be tabulated, for example related to number of times accessed, duration of use, sections accessed, and language.

## Qualitative analysis

The interviews and focus group recordings will be transcribed, and data analysis will proceed using a thematic analysis approach. This is a process of identifying, analysing, reporting, and interpreting

patterns or themes, and is one of the most used qualitative approaches in health research[39].

Codes will be applied to broad themes and then broken down further into sub-codes - 30% will be double-coded to ensure the reliability of coding, and differences will be resolved through discussion. Transcripts will be closely examined to identify key themes and sub-themes. Thematic analysis will be supported by the computer-assisted qualitative analysis software, NVivo.

## Quantitative analysis

Baseline questionnaire data will be scored according to the validated scoring algorithms from the relevant literature. Missing item-by-item data will be handled according to the scoring algorithm for each measure individually. Baseline scores will be presented descriptively, using summary statistics (means, SD, medians, IQR and percentages with associated 95% CI where appropriate) for the whole group and by arm. Distributional assumptions will be checked, and data transformation carried out if required. A comparison of randomised groups will be tabulated but not tested, in line with the feasibility aims. A comparison of baseline data for those completing and not completing the study will be tabulated to assess drop-out bias.

Scores at the two-month time point will be tabulated and compared with baseline in a complete case analysis. No hypothesis tests will be carried out but 95% CI for the difference at two months between the two arms will be estimated and reported. These will be adjusted for baseline score and any factors such as site used to balance the randomisation. Statistical analysis will be performed using Stata software, but no p-values will be presented. We will further develop and test the MoodHwb logic model (**figure 2**) using multiple methods, and examine possible mechanisms of action and active components. This will help to define a core set of outcome measures (related to the model) and identify the most appropriate primary outcome for evaluation in an effectiveness trial.

## Trial management

A Trial Management Group (TMG) and an independent TSC have been established to monitor progress and advise the researchers. The TMG will meet approximately every 8-10 weeks during the trial planning and throughout the trial. The TMG is composed of the PI, co-investigators, research assistant, trial administrator, CTR members, and University of Glasgow site team. The TSC will meet

approximately every 12 months. The TSC includes a young person, and an independent digital mental health researcher, statistician, and mixed-methods researcher.

## **Adverse event reporting and harms**

For this trial, adverse events (AEs) are defined as any untoward medical occurrence in a participant administered an intervention and which are not necessarily caused by or related to that intervention. This would include significant deterioration in mental health symptoms, including depressive and anxiety symptoms, and emergence of thoughts of self-harm. Serious adverse events (SAEs) include those resulting in death, are life-threatening, require hospitalisation or prolongation of existing hospitalisation, result in persistent or significant disability or incapacity, or other medically important conditions. The PI will assess each SAE for expectedness. A standard study/departmental procedure for documenting and dealing appropriately with these events will be followed. Participants will be signposted to appropriate resources and services if required, and their GP details will be collected at baseline, so they can be contacted. An urgent safety measure is an action that the Sponsor or PI may carry out to protect the participants of a trial against any immediate hazard to their health or safety – and must be notified to the REC immediately.

## **Ethics and dissemination**

Approvals were received from the Cardiff University School of Medicine REC and University of Glasgow College of Medical, Veterinary and Life Sciences REC for the pre-trial acceptability phase with YP. Favourable ethical opinion for the overall study and trial was obtained from Wales REC 3 (reference 21/WA/0205), and approvals were received by HRA, HCRW, university health board R&D departments in Wales, and schools in Wales (including via SHRN) and Scotland (including via SHINE). The study was registered with ISRCTN (ISRCTN12437531). Approvals were received for MoodHwb to be added to the (Apple) App Store and Google Play App Store.

We will disseminate our findings to academics, researchers, policymakers, and practitioners through high-impact open-access publications and presentations at relevant academic, clinical, and educational conferences and meetings. The findings will be disseminated online, for example on the NCMH, WCYPMH and TRIUMPH websites. Results will be made available to all participants after the study completion.

## DISCUSSION

MoodHwb is a digital programme to support YP with their mood and wellbeing, especially those experiencing elevated depressive symptoms, and families/carers, friends, and professionals who are involved in supporting them. It can be used as a website and as an app, as a standalone programme or supported by others, for example in counselling or therapy sessions. Digital mental health technologies such as this have the potential to improve reach and access to therapies at a relatively low cost. MoodHwb will help to address the need for accessible, evidence-based technologies that are developed with user input and evaluated rigorously – and will provide YP and others with more options when looking for support.

### Strengths and limitations

MoodHwb was co-designed with YP with lived experience or at high risk of depression, parents/carers, and practitioners. The programme is bilingual, interactive, personalised according to user needs and preferences, and multi-platform. It has been developed in line with evidence-based approaches, not only for YP but also for those concerned about them. Multiple methods will be used to collect data in a range of settings, including validated questionnaires, semi-structured interviews, a focus group, and Web/app usage monitoring. The involvement of participants in the second site in Scotland will help to boost recruitment and enable the exploration of transferability.

Given that this is a feasibility study, we will not be able to explore effectiveness; however the information and experience will inform the design of a future effectiveness trial. Whilst it is not feasible to blind participants to allocation; data analysis will be carried out blind to allocation. We have minimised the risk of contamination between trial arms by ensuring that a log-in is required to access MoodHwb. There will be items in the follow-up questionnaire for participants in the control arm on whether they have accessed MoodHwb during the study.

At the end of the study, there will be a period of reflection and planning regarding what further development, evaluation and implementation work are required for MoodHwb, both as a standalone and supported technology, in collaboration with YP. If it is ultimately found to be feasible and effective, it could be rolled out to help YP, families/carers, and practitioners across a range of settings.



## **Trial status**

Recruitment started in September 2022 and will end in May 2023.

## **Trial sponsor**

Cardiff University is the Sponsor of the study.

## **Authors' contributions**

RBJ designed and obtained funding for the study, with research support from SAS, FR, SM, and PS and advice from ER, RM, RP, SC, VP, and RWT (CTR). RBJ drafted the initial study protocol. All authors contributed to and approved the final version.

## **Funding statement**

This work was supported by a National Institute for Health Research (NIHR) and Health and Care Research Wales (HCRW) Post Doctoral Fellowship programme, grant number NIHR-PDF-2018, awarded to RBJ. SS was supported by UK MRC and Scottish Chief Scientist Office core funding as part of the MRC/CSO Social and Public Health Sciences Unit 'Complexity in Health Improvement' programme (MC\_UU\_12017/14 and SPHSU14) and MC-PC\_13027. The work was also supported by the NCMH, WCYPMH (established with support from the Wolfson Foundation) and TRIUMPH network.

## **Acknowledgements**

The authors would like to thank all the YP, parents, carers, professionals, and researchers who participated in the development of this protocol. We would like to thank Caroline Warren, Gareth Watson, and Tim Pickles (all Cardiff University) for their contribution to the trial administration, database and statistics respectively, and Emma McIntosh and Kathleen Boyd (both University of Glasgow) for their contributions to the health economics. We thank the TSC for their support.

## Competing interests statement

The authors declare they have no competing or potential conflicts of interest.

## REFERENCES

1. Thapar, A., Eyre, O., Patel, V., Brent, D., 2022. Depression in young people. *Lancet* 400, 617–631. [https://doi.org/https://doi.org/10.1016/S0140-6736\(22\)01012-1](https://doi.org/https://doi.org/10.1016/S0140-6736(22)01012-1)
2. Knapp, M., & Wong, G. (2020). Economics and mental health: the current scenario. *World Psychiatry : Official Journal of the World Psychiatric Association (WPA)*, 19(1), 3–14. <https://doi.org/10.1002/WPS.20692>
3. Trautmann, S., Rehm, J., & Wittchen, H. (2016). The economic costs of mental disorders: Do our societies react appropriately to the burden of mental disorders? *EMBO Reports*, 17(9), 1245. <https://doi.org/10.15252/EMBR.201642951>
4. Potter, R., Mars, B., Eyre, O., Legge, S., Ford, T., Sellers, R., ... Thapar, A. K. (2012). Missed opportunities: mental disorder in children of parents with depression. *The British Journal of General Practice : The Journal of the Royal College of General Practitioners*, 62(600), e487-93. <https://doi.org/10.3399/bjgp12X652355>
5. Neufeld, S. A. S., Dunn, V. J., Jones, P. B., Croudace, T. J., & Goodyer, I. M. (2017). Reduction in adolescent depression after contact with mental health services: a longitudinal cohort study in the UK. *The Lancet. Psychiatry*, 4(2), 120–127. [https://doi.org/10.1016/S2215-0366\(17\)30002-0](https://doi.org/10.1016/S2215-0366(17)30002-0)
6. Bennett, C., Jones, R. B., & Smith, D. (2014). Prevention strategies for adolescent depression. *Advances in Psychiatric Treatment*, 20(2), 116–124. <https://doi.org/10.1192/apt.bp.112.010314>
7. National Institute for Health and Clinical Excellence (NICE). (2019). Depression In Children and Young People. *NICE Clinical Guideline*. Retrieved from <http://guidance.nice.org.uk/CG28/Guidance>
8. Birmaher, B., Brent, D., 2007. Practice Parameter for the Assessment and Treatment of Children and Adolescents With Depressive Disorders. *J. Am. Acad. Child Adolesc. Psychiatry* 46, 1503–1526. <https://doi.org/10.1097/CHI.0B013E318145AE1C>
9. Office for National Statistics. (2019). Exploring the UK’s digital divide - Office for National Statistics. *Office for National Statistics*, 1–24.

10. Ofcom. (2021). Online Nation 2021, (June), 16. Retrieved from [https://www.ofcom.org.uk/data/assets/pdf\\_file/0013/220414/online-nation-2021-report.pdf](https://www.ofcom.org.uk/data/assets/pdf_file/0013/220414/online-nation-2021-report.pdf)
11. Naslund, J. A., Aschbrenner, K. A., Araya, R., Marsch, L. A., Unützer, J., Patel, V., & Bartels, S. J. (2017). Digital technology for treating and preventing mental disorders in low-income and middle-income countries: a narrative review of the literature. *The Lancet Psychiatry*, 4(6), 486–500. [https://doi.org/10.1016/S2215-0366\(17\)30096-2](https://doi.org/10.1016/S2215-0366(17)30096-2)
12. Hollis, C., Falconer, C. J., Martin, J. L., Whittington, C., Stockton, S., Glazebrook, C., & Davies, E. B. (2017). Annual Research Review: Digital health interventions for children and young people with mental health problems-a systematic and meta-review. 58(4): 474-503. <https://doi.org/10.1111/jcpp.12663>
13. Grist, R., Croker, A., Denne, M., & Stallard, P. (2019). Technology Delivered Interventions for Depression and Anxiety in Children and Adolescents: A Systematic Review and Meta-analysis. *Clinical Child and Family Psychology Review*, 22(2), 147–171. <https://doi.org/https://dx.doi.org/10.1007/s10567-018-0271-8>
14. Bevan Jones, R., Hussain, F., Agha, S. S., Weavers, B., Lucassen, M., Merry, S., ... Rice, F. (2022). Digital technologies to support adolescents with depression and anxiety: review. *BJPsych Advances*, 1–15. <https://doi.org/DOI:10.1192/bja.2022.3>
15. Bevan Jones, R., Thomas, J., Lewis, J., Read, S., All, I. J.-R. for, & 2017, U. (2017). Translation: from bench to brain—using the visual arts and metaphors to engage and educate. *Scienceopen.Com*, 1(2), 265–283. <https://doi.org/10.18546/RFA.01.2.04>
16. Bevan Jones, R., Thapar, A., Rice, F., Beeching, H., Cichosz, R., Mars, B., ... Simpson, S. A. (2018b). A web-based psychoeducational intervention for adolescent depression: design and development of MoodHwb. *JMIR Mental Health*, 5(2). <https://doi.org/10.2196/mental.8894>
17. Bevan Jones, R., Stallard, P., Agha, S. S., Rice, S., Werner-Seidler, A., Stasiak, K., ... Merry, S. (2020b). Practitioner review: Co-design of digital mental health technologies with children and young people. *Journal of Child Psychology and Psychiatry*, 61(8), 928–940. <https://doi.org/10.1111/JCPP.13258>
18. Bevan Jones, R., Thapar, A., Stone, Z., Thapar, A., Jones, I., Smith, D., & Simpson, S. (2018a). Psychoeducational interventions in adolescent depression: A systematic review. *Patient Education and Counseling*, 101(5), 804–816. <https://doi.org/10.1016/J.PEC.2017.10.015>
19. Bevan Jones, R., Thapar, A., Rice, F., Mars, B., Agha, S. S., Smith, D., ... Simpson, S. A. (2020a). A Digital Intervention for Adolescent Depression (MoodHwb): Mixed Methods Feasibility Evaluation. *JMIR Ment Health* 2020;7(7):E14536 <https://Mental.Jmir.Org/2020/7/E14536>, 7(7), e14536. <https://doi.org/10.2196/14536>

20. Craig, P., Dieppe, P., Macintyre, S., Mitchie, S., Nazareth, I., & Petticrew, M. (2008). Developing and evaluating complex interventions: the new Medical Research Council guidance. *BMJ*, 337(7676), 979–983. <https://doi.org/10.1136/BMJ.A1655>
21. Skivington, K., Matthews, L., Simpson, S.A., Craig, P., Baird, J., Blazeby, J.M., Boyd, K.A., Craig, N., French, D.P., McIntosh, E., Petticrew, M., Rycroft-Malone, J., White, M., Moore, L., 2021. A new framework for developing and evaluating complex interventions: update of Medical Research Council guidance. *BMJ* 374. <https://doi.org/10.1136/bmj.n2061>
22. Yardley, L., Morrison, L., Bradbury, K., & Muller, I. (2015). The Person-Based Approach to Intervention Development: Application to Digital Health-Related Behavior Change Interventions. *J Med Internet Res* 2015;17(1):E30 <https://www.jmir.org/2015/1/E30>, 17(1), e4055. <https://doi.org/10.2196/JMIR.4055>
23. Angold, A., Costello, E., Messer SC, & Pickles A. (1995). Development of a short questionnaire for use in epidemiological studies of depression in children and adolescents. *International Journal of Methods in Psychiatric Research*. Retrieved from <https://psycnet.apa.org/record/1996-02633-002>
24. Daviss, W., Birmaher, B., Melhem, N. A., Axelson, D. A., Michaels, S. M., & Brent, D. A. (2006). Criterion validity of the Mood and Feelings Questionnaire for depressive episodes in clinic and non-clinic subjects. *Journal of Child Psychology and Psychiatry and Allied Disciplines*, 47(9), 927–934. <https://doi.org/10.1111/j.1469-7610.2006.01646.x>
25. Smith, P., Scott, R., Eshkevari, E., Jatta, F., Leigh, E., Harris, V., ... Yule, W. (2015). Computerised CBT for depressed adolescents: Randomised controlled trial. *Behaviour Research and Therapy*, 73, 104–110. <https://doi.org/10.1016/J.BRAT.2015.07.009>
26. Wright, B., Tindall, L., Hargate, R., Allgar, V., Trépel, D., & Ali, S. (2019). Computerised cognitive-behavioural therapy for depression in adolescents: 12-month outcomes of a UK randomised controlled trial pilot study. *BJPsych Open*, 6(1). <https://doi.org/10.1192/BJO.2019.91>
27. Hart, S. R., Kastelic, E. A., Wilcox, H. C., Mary, •, Beaudry, B., Musci, R. J., ... Swartz, K. L. (2014). Achieving Depression Literacy: The Adolescent Depression Knowledge Questionnaire (ADKQ). <https://doi.org/10.1007/s12310-014-9120-1>
28. Griffiths, K. M., Christensen, H., Jorm, A. F., Evans, K., & Groves, C. (2004). Effect of web-based depression literacy and cognitive-behavioural therapy interventions on stigmatising attitudes to depression: randomised controlled trial. *The British Journal of Psychiatry : The Journal of Mental Science*, 185(OCT.), 342–349. <https://doi.org/10.1192/BJP.185.4.342>
29. Schwarzer, R., & Jerusalem, M. (1995). General Self-Efficacy Scale. *J. Weinman, S. Wright, & M. Johnston, Measures in Health Psychology: A User's Profile. Causal and Control Beliefs*, 35. Retrieved from <https://psycnet.apa.org/doiLanding?doi=10.1037%2Ft00393-000>

30. Wilson, C. J., Deane, F. P., Ciarrochi, J., & Rickwood, D. (2005). Measuring Help-Seeking Intentions: Properties of the General Help-Seeking Questionnaire. *Canadian Journal of Counselling, 39*(1), 15–28. Retrieved from <https://psycnet.apa.org/record/2005-05989-002>
31. Tennant, R., Hiller, L., Fishwick, R., Platt, S., Joseph, S., Weich, S., ... Stewart-Brown, S. (2007). The Warwick-Edinburgh mental well-being scale (WEMWBS): Development and UK validation. *Health and Quality of Life Outcomes, 5*(1), 1–13. <https://doi.org/10.1186/1477-7525-5-63/TABLES/4>
32. Ebesutani, C., Korathu-Larson, P., Nakamura, B. J., Higa-McMillan, C., & Chorpita, B. (2017). The Revised Child Anxiety and Depression Scale 25–Parent Version: Scale Development and Validation in a School-Based and Clinical Sample. *Assessment, 24*(6), 712–728. <https://doi.org/10.1177/1073191115627012>
33. Zigmond, A. S., & Snaith, R. P. (1983). The Hospital Anxiety and Depression Scale. *Acta Psychiatrica Scandinavica, 67*(6), 361–370. <https://doi.org/10.1111/J.1600-0447.1983.TB09716.X>
34. Johnson, J. H., & McCutcheon, S. M. (1980). Assessing life stress in older children and adolescents: Preliminary findings with the Life Events Checklist. *Stress and anxiety, 7*, 111-125.
35. Moore, G. F., Audrey, S., Barker, M., Bond, L., Bonell, C., Hardeman, W., ... Baird, J. (2015). Process evaluation of complex interventions: Medical Research Council guidance. *BMJ (Clinical Research Ed.)*, *350*, h1258. <https://doi.org/10.1136/bmj.h1258>
36. National Institute for Health and Clinical Excellence (NICE). (2012). 6 Incorporating health economics | Methods for the development of NICE public health guidance (third edition) | Guidance | NICE. Retrieved March 1, 2022, from <https://www.nice.org.uk/process/pmg4/chapter/incorporating-health-economics>
37. Tudor Edwards, R., & McIntosh, E. (2019). *Applied Health Economics for Public Health Practice and Research* (1st ed.). Oxford, UK: Oxford University Press. <https://doi.org/10.1093/med/9780198737483.001.0001>
38. Rennie, D. (2001). CONSORT revised--improving the reporting of randomized trials. *JAMA* *285*, 2006–2007. <https://doi.org/10.1001/JAMA.285.15.2006>
39. Pope, C., & Mays, N. (2006). *Qualitative methods in health research* (Vol. 5). Blackwell Publishing: BMJ Books.

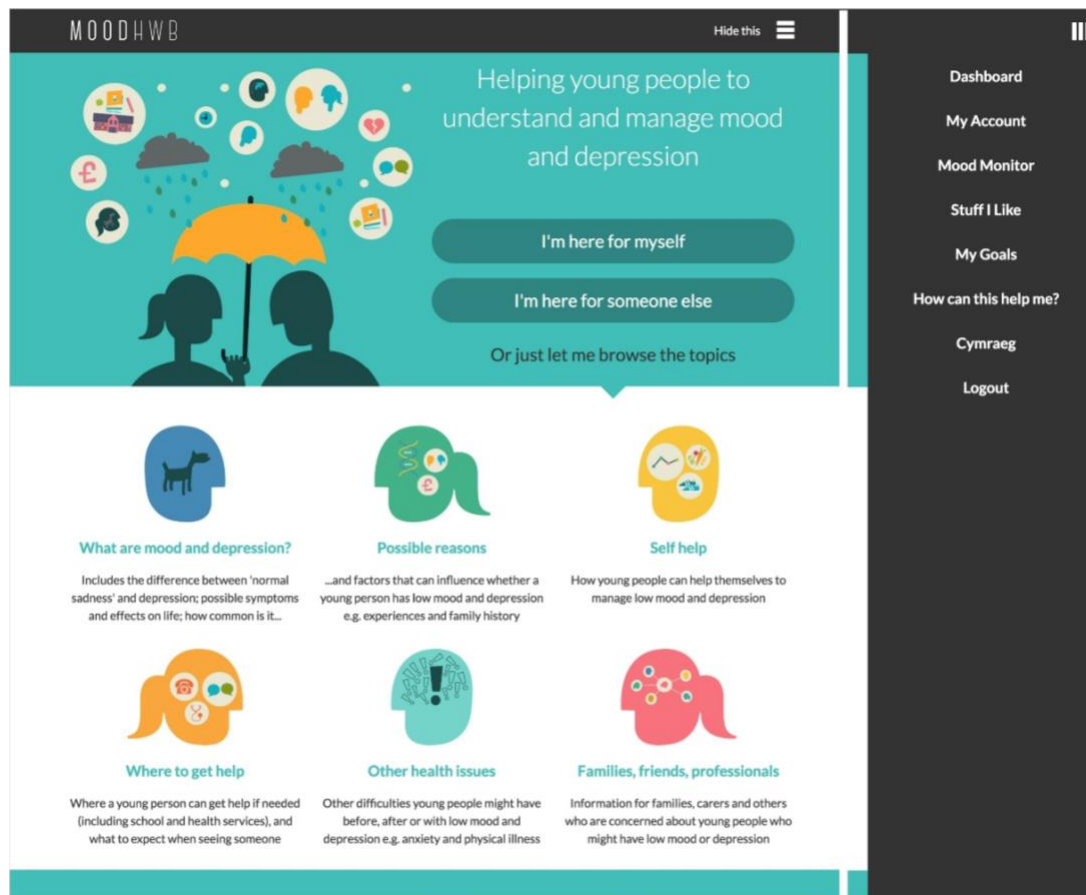

Figure 1:

MoodHwb (v1) welcome screen (main image/left) and open menu (right)

(from Bevan Jones et al. 2020a)

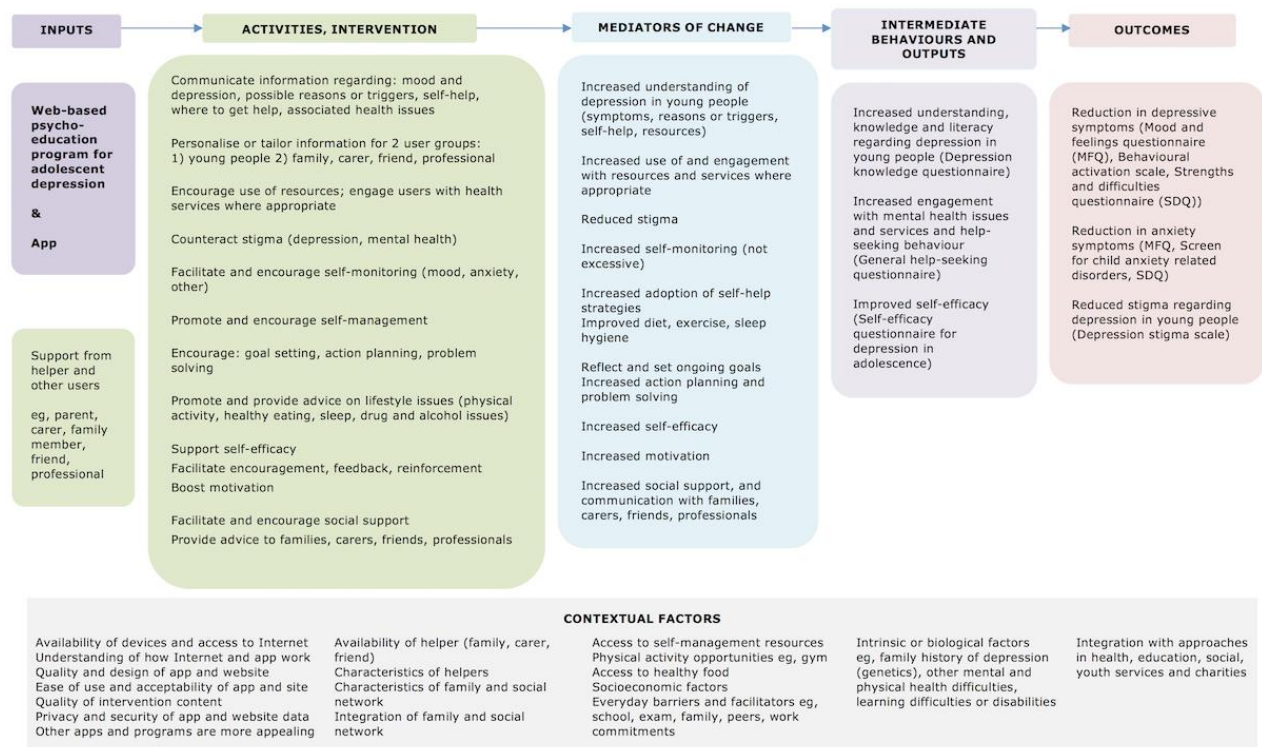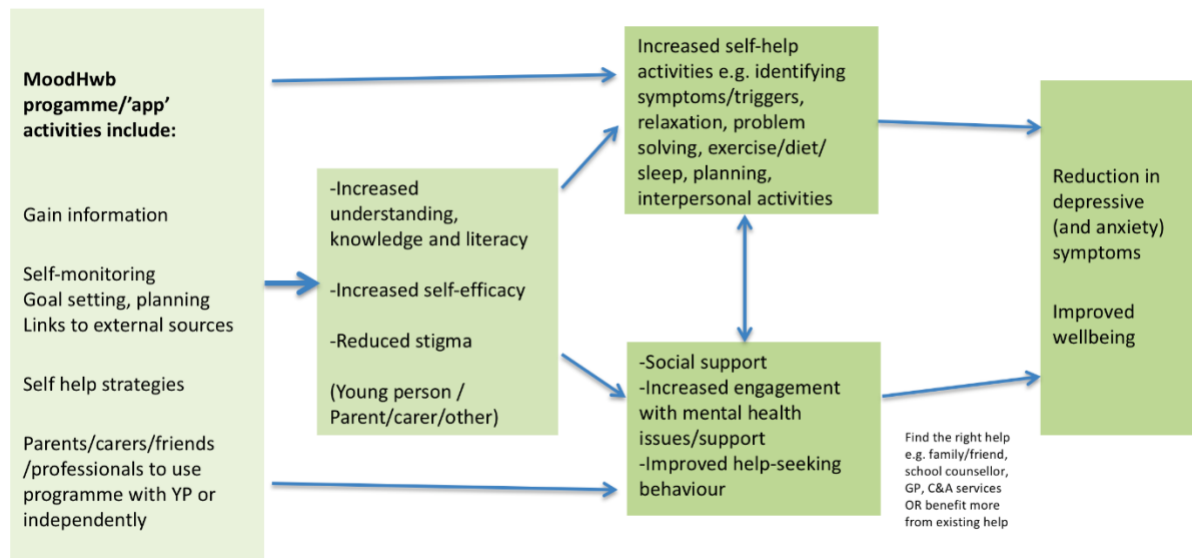

Figure 2:

Logic model for MoodHwb (above, from Bevan Jones et al 2018b), including potential pathways (below)

(applies primarily to the young person using the programme, although other users (parent/carer/other) might also benefit from the programme through e.g. increased depression literacy/knowledge or reduced stigma)

**Figure 3: Participant flow diagram**

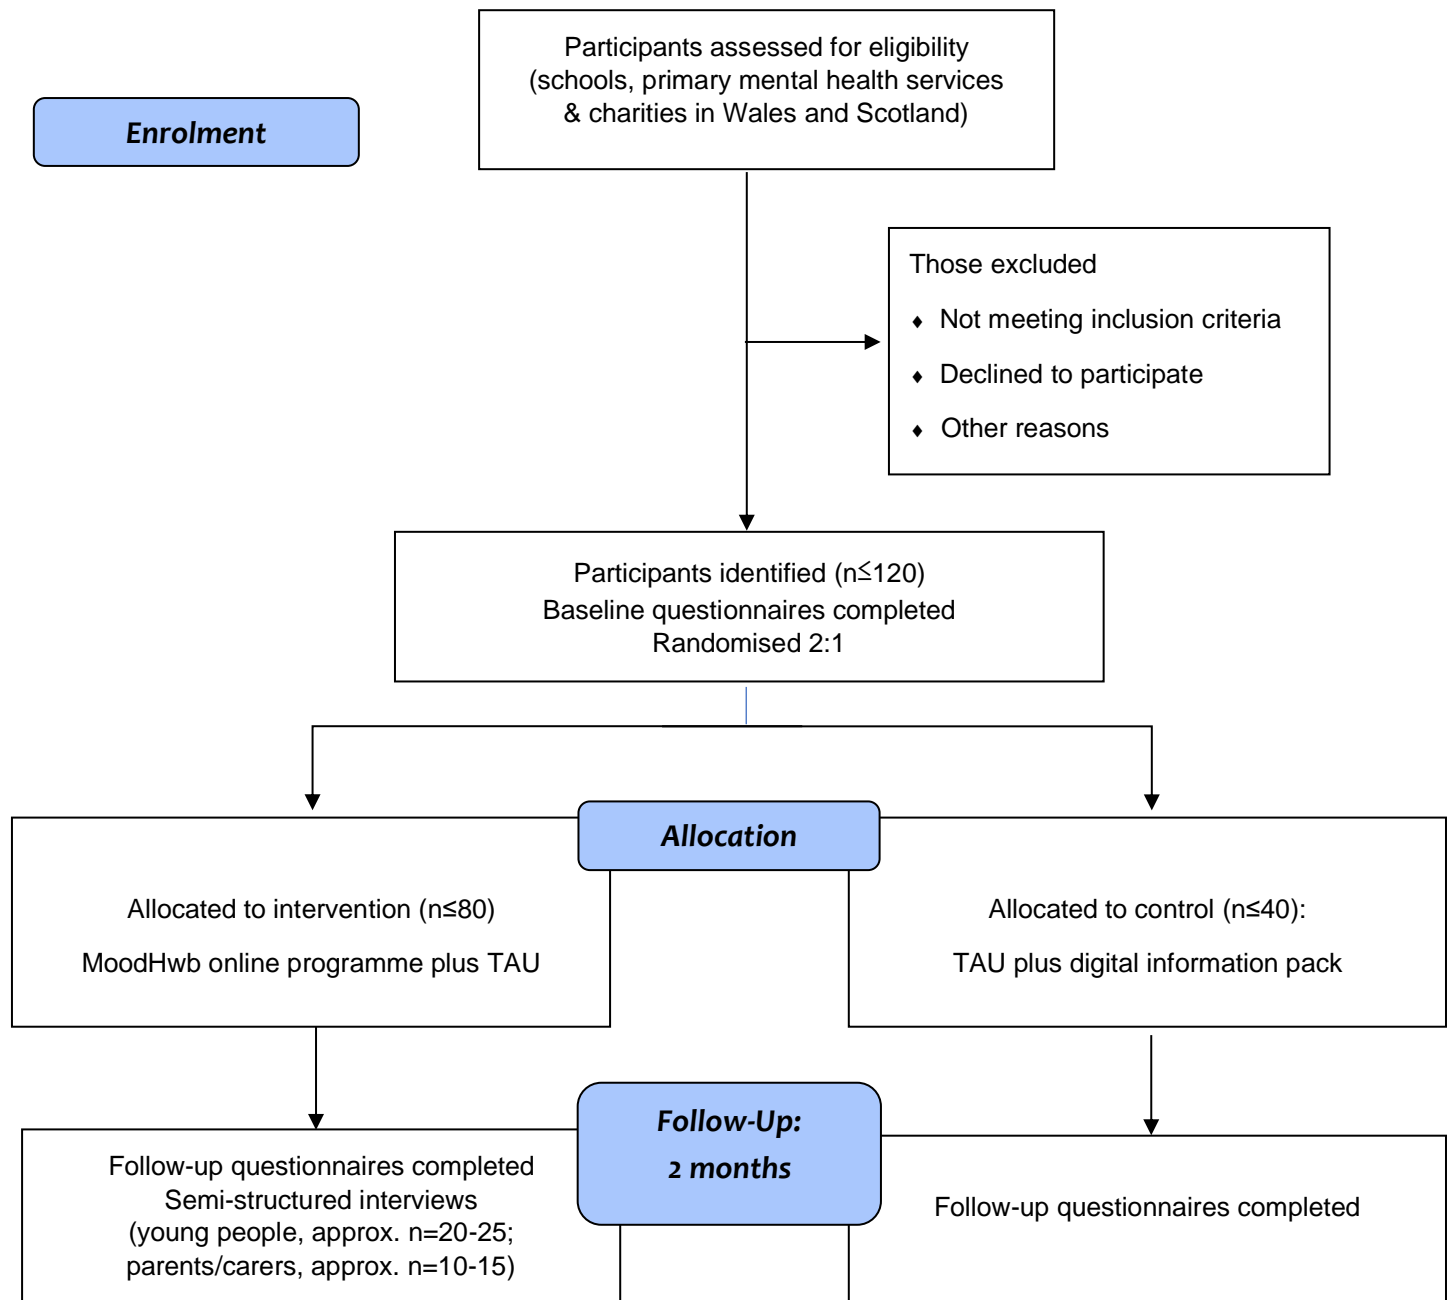

NB: Web/app usage data of those in the intervention arm will be collected for 6 months after baseline.
